# Supplementary material for: Various magnetic states for novel layered cobalt oxides CaCo6O11and BaCo6O11
Source: Royal Society of Chemistry journal article supplement (doi:10.1039/c9qm00524b), 2019-01-01
Supplement: c9qm00524b1.pdf [file c9qm00524b1.pdf]

## Supplementary Information

### Various magnetic states for novel layered cobalt oxides $\text{CaCo}_6\text{O}_{11}$ and $\text{BaCo}_6\text{O}_{11}$

Ikuya Yamada,<sup>a,b\*</sup> Fumito Toda,<sup>c</sup> Shogo Kawaguchi,<sup>d</sup> Matteo d'Astuto<sup>b</sup>

<sup>a</sup>Department of Materials Science, Graduate School of Engineering, Osaka Prefecture University

1-2 Gakuen-cho, Naka-ku, Sakai, Osaka 599-8570, Japan

<sup>b</sup>Université Grenoble Alpes, CNRS, Grenoble INP, Institut Néel, 38000 Grenoble, France

<sup>c</sup>School of Materials, Chemistry and Chemical Engineering, College of Engineering,

Osaka Prefecture University, 1-1 Gakuen-cho, Naka-ku, Sakai, Osaka 599-8231, Japan

<sup>d</sup>Japan Synchrotron Radiation Research Institute (JASRI), 1-1-1 Kouto, Sayo-cho, Sayo-gun, Hyogo 679-5198,  
Japan

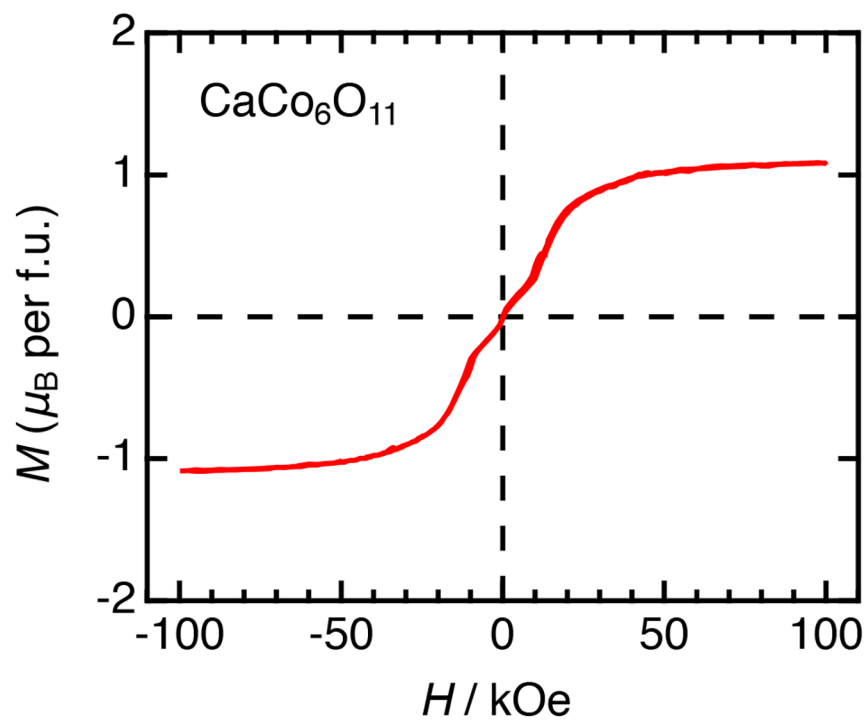

**Figure S1.** An isothermal magnetization curve measured at 1.8 K for  $\text{CaCo}_6\text{O}_{11}$ . The magnetization almost saturates at  $\sim 1\mu_B$  above 40 kOe.

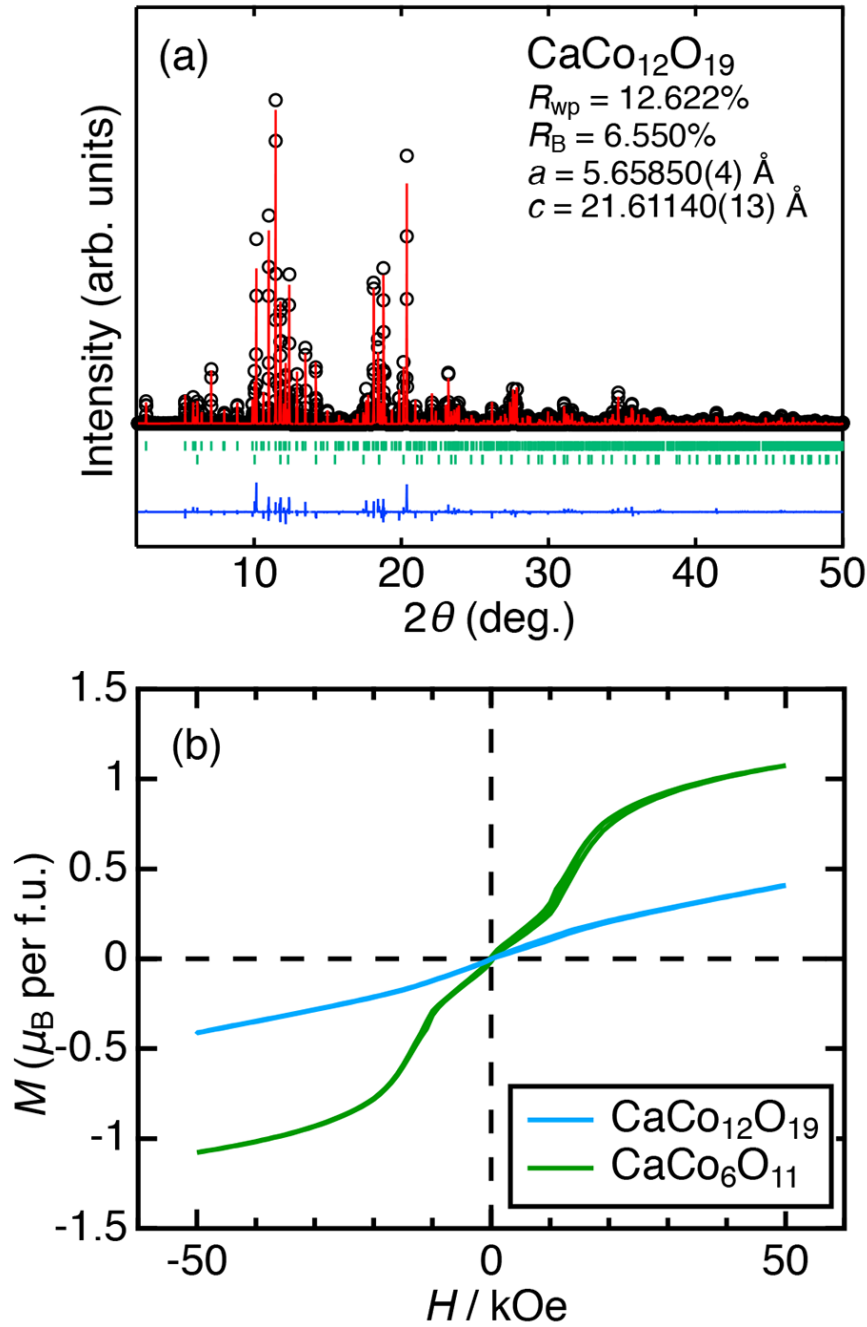

**Figure S2.** (a) Observed SXR D patterns and the Rietveld refinement results for  $\text{CaCo}_{12}\text{O}_{19}$ . The circles (black) and solid lines (red) represent observed and calculated patterns, respectively. The difference between the observed and calculated patterns is shown at the bottom (blue). The vertical marks (green) indicate the Bragg reflection positions of  $\text{CaCo}_{12}\text{O}_{19}$  (upper, 87.5 wt%) and  $\text{Co}_3\text{O}_4$  (bottom, 12.5 wt%). The space group was  $P6_3/mmc$ , as well as the isostructural compound  $\text{SrCo}_{12}\text{O}_{19}$ . (b) Isothermal magnetization curves measured at 1.8 K for  $\text{CaCo}_{12}\text{O}_{19}$ . The data for  $\text{CaCo}_6\text{O}_{11}$  measured at 5 K (Figure 6 in the manuscript) are also shown.

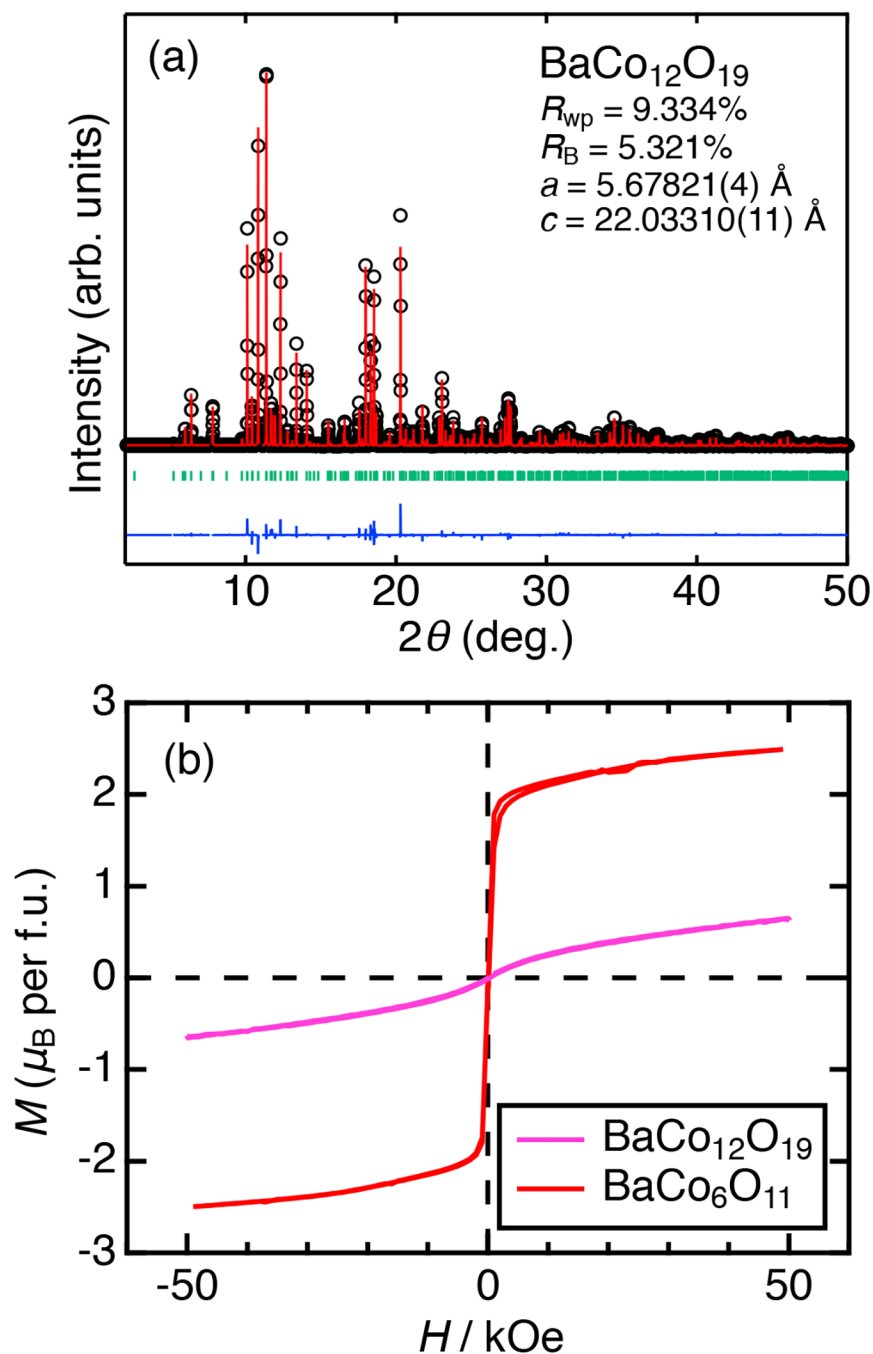

**Figure S3.** (a) Observed SXR diffraction patterns and the Rietveld refinement results for  $\text{BaCo}_{12}\text{O}_{19}$ . The circles (black) and solid lines (red) represent observed and calculated patterns, respectively. The difference between the observed and calculated patterns is shown at the bottom (blue). The vertical marks (green) indicate the Bragg reflection positions of  $\text{BaCo}_{12}\text{O}_{19}$ . The space group was  $P6_3/mmc$ , as well as the isostructural compound  $\text{SrCo}_{12}\text{O}_{19}$ . (b) Isothermal magnetization curves measured at 1.8 K for  $\text{BaCo}_{12}\text{O}_{19}$ . The data for  $\text{BaCo}_6\text{O}_{11}$  measured at 5 K (Figure 6 in the manuscript) are also shown.
